# Supplementary material
Source: Research Square preprint supplement (doi:10.21203/rs.3.rs-9224953/v1)

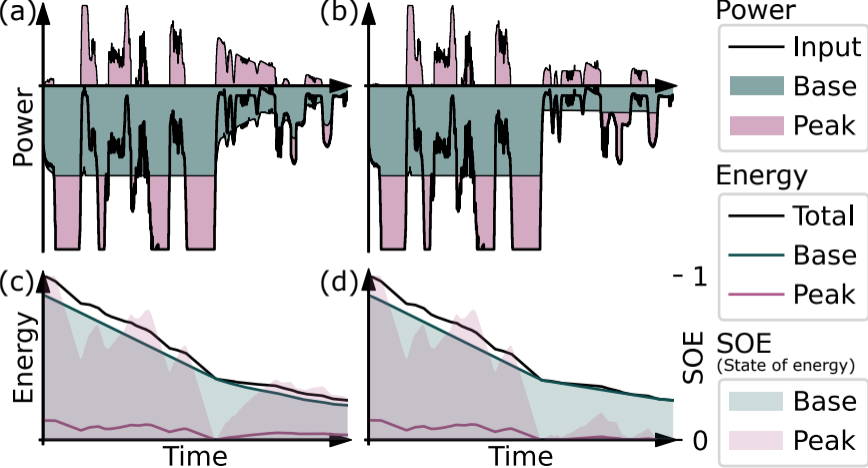

Supplement: Supplementary file 1 [file 629ad836cdde5561547ea246.pdf]

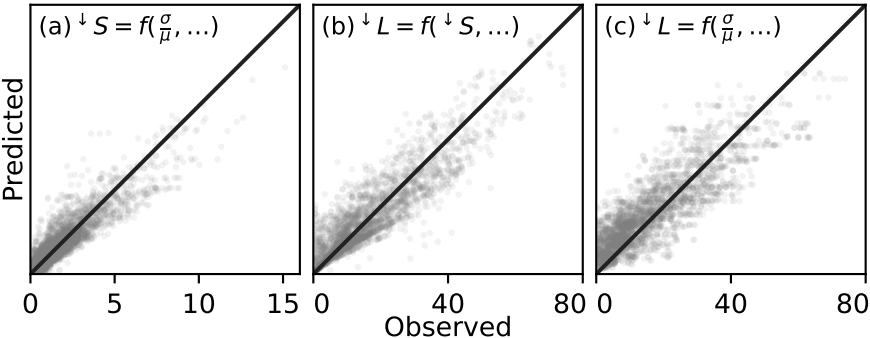

Supplement: Supplementary file 2 [file c790e0c82531c63f28382a31.pdf]
